# Supplementary material for: Transcriptome Profiling of Bovine Macrophages Infected by Mycobacterium avium spp. paratuberculosis Depicts Foam Cell and Innate Immune Tolerance Phenotypes
Source: PubMed Central journal article supplement (PMC6960179; doi:10.3389/fimmu.2019.02874), 2020-01-08

**A**

**200x magnification**

**Control**

**MAP infection**

**JD(-)  
#2**

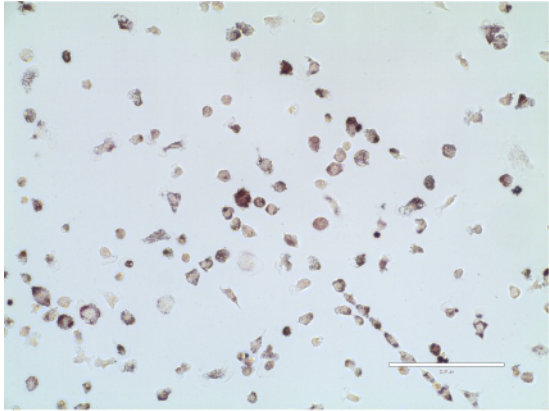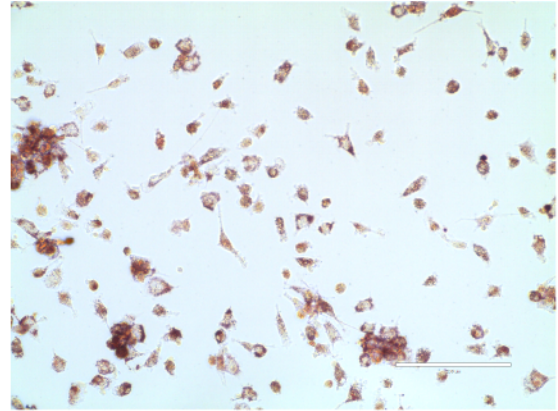

**JD(-)  
#3**

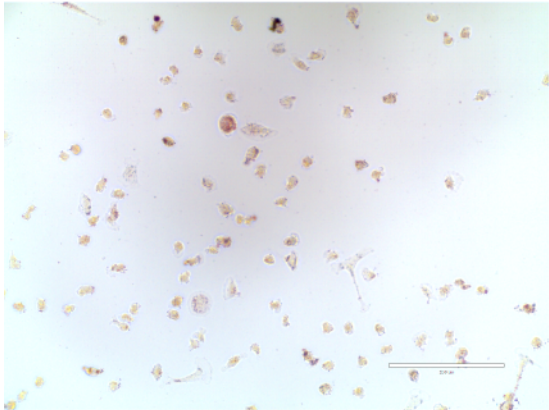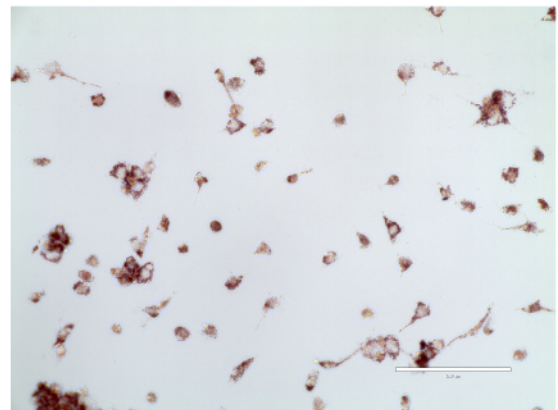

**JD(+)  
#2**

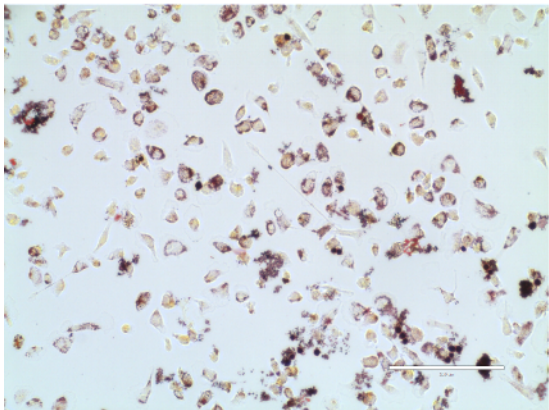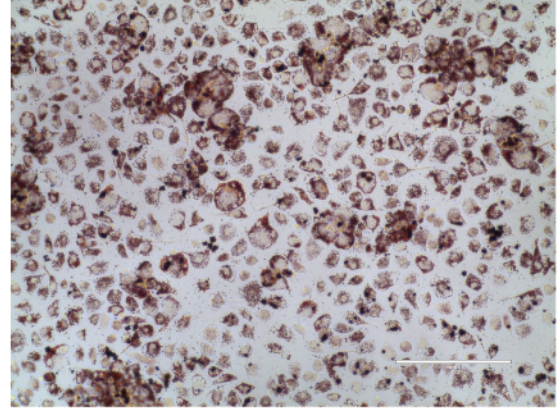

**JD(+)  
#3**

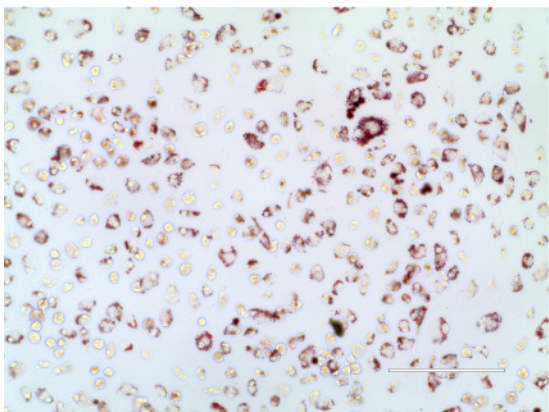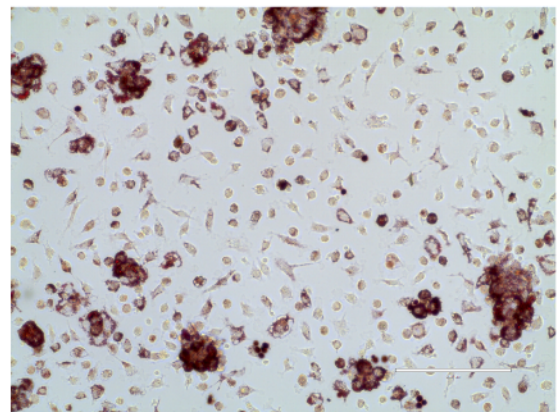



**B**

**400x magnification**

**Control**

**MAP infection**

**JD(-)  
#2**

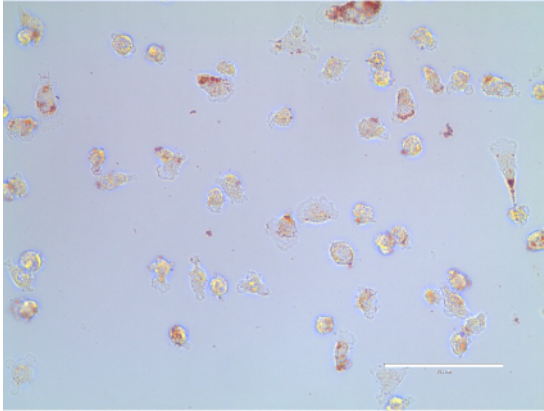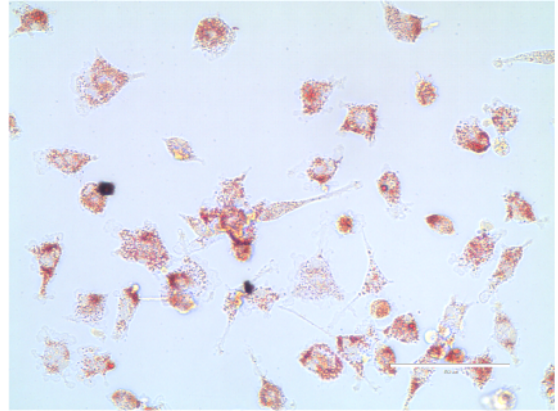

**JD(-)  
#3**

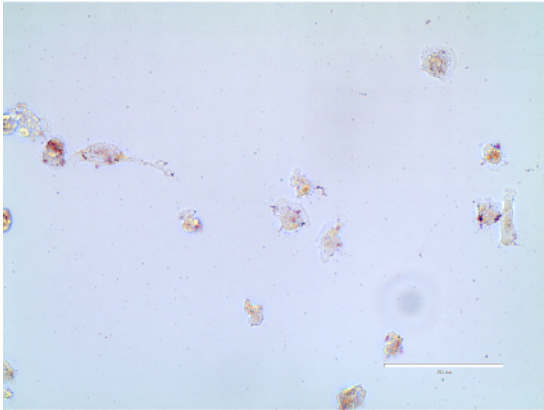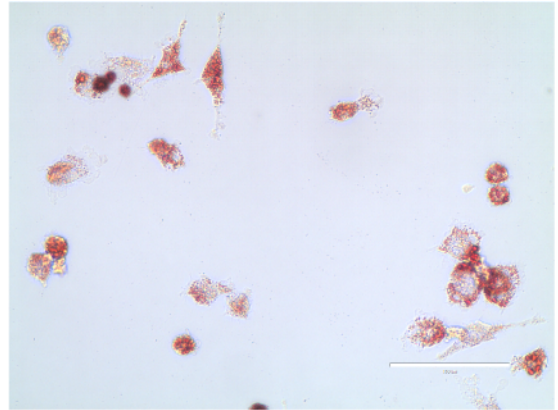

**JD(+)  
#2**

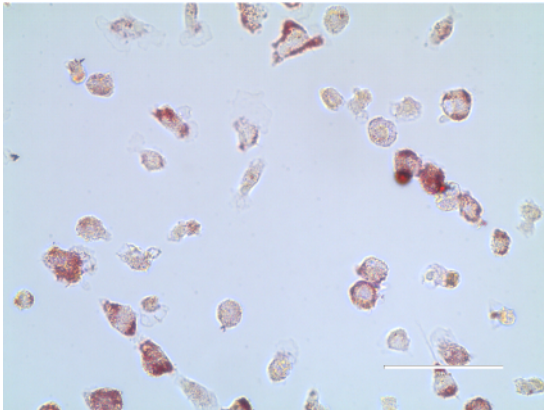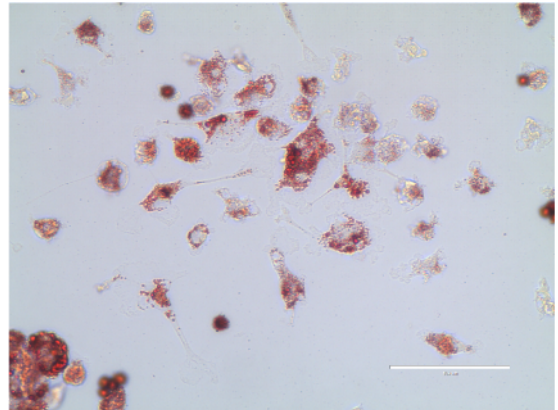

**JD(+)  
#3**

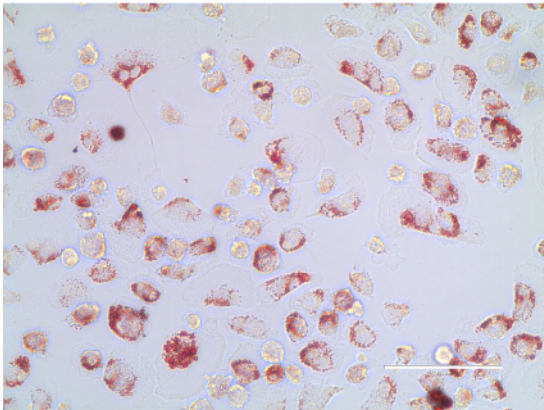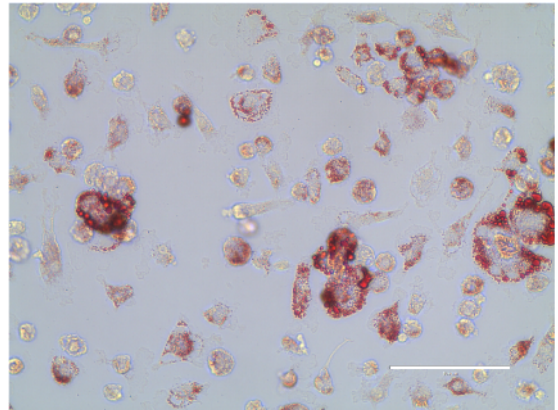

Supplement: Image_3.pdf [file Image_3.pdf]
