# Supplementary material for: Transcriptome Profiling of Bovine Macrophages Infected by Mycobacterium avium spp. paratuberculosis Depicts Foam Cell and Innate Immune Tolerance Phenotypes
Source: Front Immunol. 2020 Jan 8;10:2874. doi: 10.3389/fimmu.2019.02874 (PMC6960179; doi:10.3389/fimmu.2019.02874)
Supplement: Supplementary Table 10 — IPA pathways at 4 hpi over-represented by DE genes in macrophages from JD (+) cows. [file Table_10.XLSX]

## Sheet: Table_S10
	Table S10: IPA pathways at 4hpi over-represented by DE genes in macrophages from JD (+) cows.
	Pathways	p-value	Adj. p-value 1	Ratio2	Number of genes	z-score3		Genes
	Hepatic Fibrosis / Hepatic Stellate Cell Activation	1.12202e-08	9.77237e-07	0.04	7	n.a		COL1A2, COL1A1, MYH10, ACTA2, COL12A1, PDGFRA, COL3A1
	Intrinsic Prothrombin Activation Pathway	1.23027e-05	0.000537032	0.10	3	n.a		COL1A2, COL1A1, COL3A1
	Atherosclerosis Signaling	0.000933254	0.0229087	0.02	3	n.a		COL1A2, COL1A1, COL3A1
	Cellular Effects of Sildenafil (Viagra)	0.00104713	0.0229087	0.02	3	n.a		MYH10, ACTA2, PDE5A
	RhoGDI Signaling	0.00245471	0.0371535	0.01	3	n.a		RND3, ACTA2, CDH11
	Dendritic Cell Maturation	0.00263027	0.0371535	0.02	3	n.a		COL1A2, COL1A1, COL3A1
	ILK Signaling	0.00301995	0.0371535	0.02	3	n.a		MYH10, RND3, ACTA2
	Integrin Signaling	0.00371535	0.040738	0.02	3	n.a		RND3, ACTA2, CAV1
	1 The Benjamini–Hochberg multiple testing adjusted p-value.
	2 The ratio of DE genes detected in our analysis over the total number of genes listed in the pathway.
	3 IPA activation score not available (n.a.).
